# Supplementary material for: CXCL1-Triggered Interaction of LFA1 and ICAM1 Control Glucose-Induced Leukocyte Recruitment during InflammationIn Vivo
Source: Hindawi journal article supplement (doi:10.1155/2012/739176), 2012-01-01
Supplement: f1 [file 739176.f1.pdf]

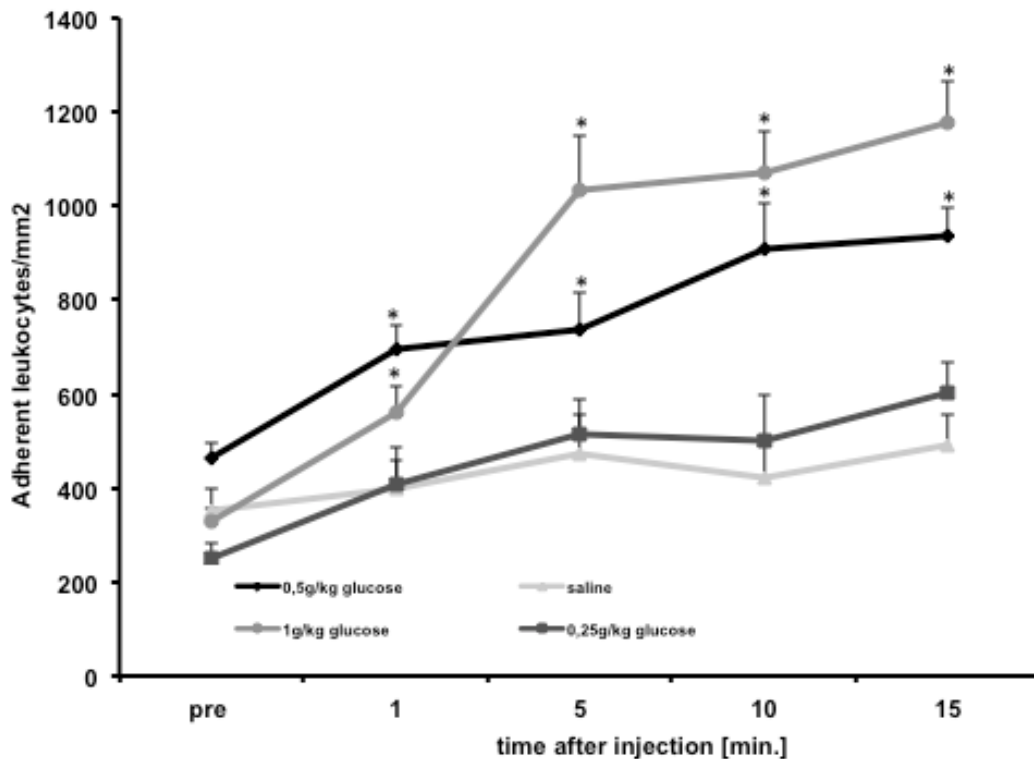

**Supplemental Figure 1: Leukocyte adhesion (number of adherent cells/mm<sup>2</sup>) in mouse cremaster muscle venules after varying doses of glucose or normal saline injection in trauma-induced inflammation.** Leukocyte adhesion was observed in trauma-stimulated cremaster muscle venules of wild type mice injected with 0,25g/kg glucose (12 venules in 3 mice), 0,5g/kg glucose (64 venules in 16 mice) and 1g/kg glucose (10 venules in 4 mice). The number of adherent leukocytes was quantified before and during 15 minutes after intravenous injection of glucose and compared to injection of normal saline (18 venules in 4 mice). Significant differences ( $p < 0.05$ ) are indicated by the asterisks

**Supplemental Table 1. Course of blood glucose concentration.** Blood glucose concentration was measured in blood samples obtained via carotid artery before and at different time points after intravenous injection of variable doses of glucose or saline as control. All parameters are presented as mean  $\pm$  SEM; # displays a significant difference when compared to initial blood glucose concentration.

| <u>Dose of glucose ( g/kg)</u> | <u>Blood glucose concentration (mg/dl)</u> |                           |                            |
|--------------------------------|--------------------------------------------|---------------------------|----------------------------|
|                                | <u>Before injection</u>                    | <u>1' after injection</u> | <u>10' after injection</u> |
| 0                              | 270 $\pm$ 30                               | 290 $\pm$ 20              | 320 $\pm$ 20               |
| 0,25                           | 210 $\pm$ 50                               | 270 $\pm$ 50              | 280 $\pm$ 70               |
| 0,5                            | 250 $\pm$ 20                               | 430 $\pm$ 20 (#)          | 320 $\pm$ 10               |
| 1,0                            | 280 $\pm$ 30                               | 500 $\pm$ 100 (#)         | 490 $\pm$ 90 (#)           |
